# Supplementary material
Source: PubMed Central journal article supplement (PMC6248085)
Supplement: jamaoncol-4-1543-s001.pdf [file jamaoncol-4-1543-s001.pdf]

## Supplementary Online Content

Ferrara R, Mezquita L, Texier M, et al. Hyperprogressive disease in patients with advanced non–small cell lung cancer treated with PD-1/PD-L1 inhibitors or with single-agent chemotherapy. Published online September 6, 2018. doi:10.1001/jamaoncol.2018.3676

### **eMethods.** Supplemental Methods

**eFigure 1.** Flowchart for delta TGR Evaluation in the Immunotherapy Cohort (From a Single Institution)

**eFigure 2.** Box Plots Showing Baseline Tumor Burden (A) and Number of Previous Lines (B) Distributions According to HPD Status (Immunotherapy Cohort)

**eFigure 3.** Flowchart for delta TGR Evaluation in the Chemotherapy Cohort (From a Single Institution)

**eTable 1.** Typical and Atypical Response Patterns to PD-1/PD-L1 Inhibitors and Single-Agent Chemotherapy

**eTable 2.** TGR Analysis in the Immunotherapy and Single-Agent Chemotherapy Cohorts

**eTable 3.** Patient Characteristics in the Chemotherapy Cohort

### **eReference**

This supplementary material has been provided by the authors to give readers additional information about their work.

## eMethods. Supplemental Methods

### Computation of tumor growth rate (TGR) and timing of TGR assessment

Assuming tumor growth follows an exponential law,  $V_t$ , tumor volume at time  $t$  (expressed in months in the tumor evaluation) is equal to  $V_t = V_0 \exp(TG \cdot t)$ , where  $V_0$  is volume at baseline, and  $TG$  is the growth rate. We approximated the tumor volume ( $V$ ) by  $V = \frac{4}{3} \pi R^3$ , where  $R$ , the radius of the sphere, is equal to  $D/2$ . Consequently,  $TG$  is equal to  $TG = \frac{3 \log(D_t/D_0)}{t_1 - t_0}$ , where  $\log$  represents natural logarithms and  $t_1 - t_0$  is the time between evaluations in months. TGR results were reported as a percent increase in tumor volume per month using the following transformation:  $TGR = 100 [\exp(TG) - 1]$ , where  $\exp(TG)$  represents the exponential of  $TG$ <sup>1</sup>. The algorithm for TGR calculation is publicly available online ([https://github.com/chferte/TumorGrowthRate/blob/master/TGR\\_calculator.R](https://github.com/chferte/TumorGrowthRate/blob/master/TGR_calculator.R)). Tumor volume was evaluated at three timepoints: before treatment with IO or chemotherapy [(n-1) CT scan], at baseline [baseline (n) CT scan], and once during treatment [(n+1) CT scan]. TGR was then calculated before [(n) CT scan vs (n-1) CT scan] and during [(n+1) CT scan vs (n) CT scan] for both the PD-1/PD-L1 inhibitor cohort and single-agent chemotherapy cohort.

**eFigure 1.** Flowchart for *delta* TGR Evaluation in the Immunotherapy Cohort (From a Single Institution)

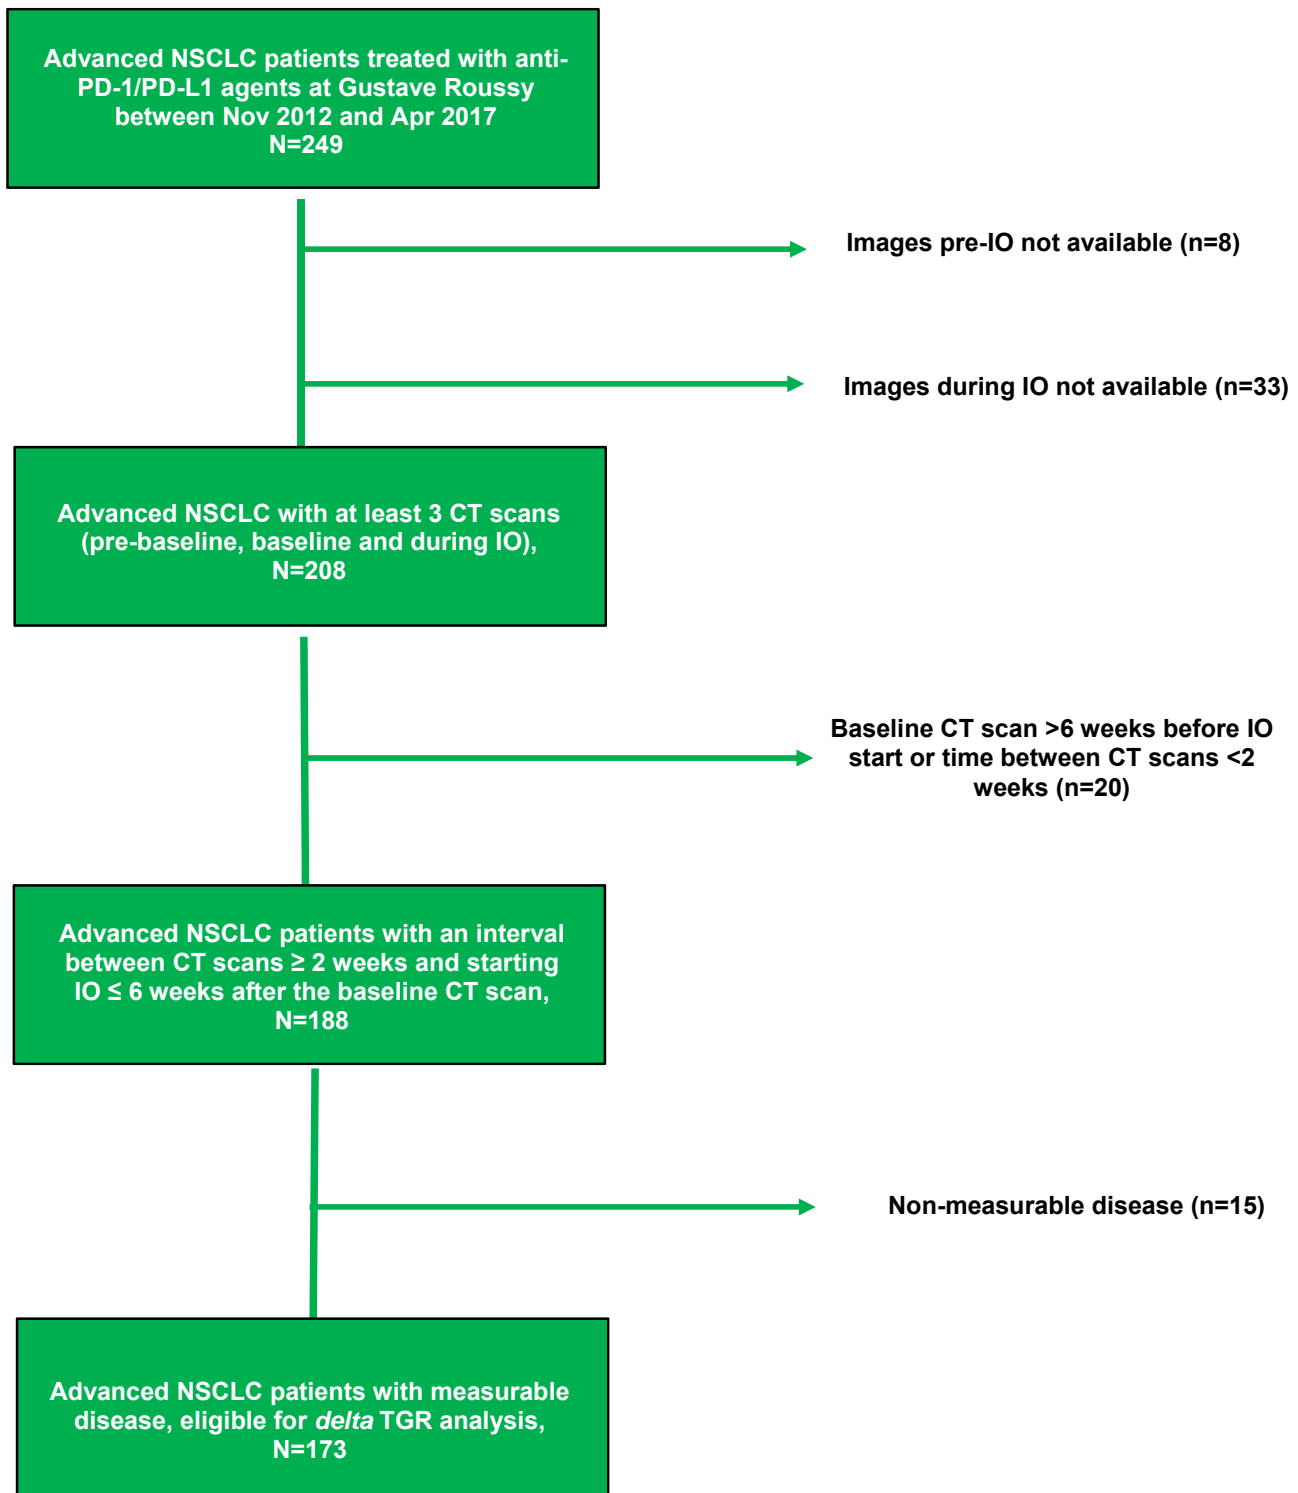

Out of 249 patients treated with PD-(L)-1 inhibitors at Gustave Roussy, 76 (~30%) were excluded because of unavailability of CT scans before (3%) or during IO (13%), inadequate time intervals between CT scans (8%) or absence of measurable disease (6%).

**eFigure 2.** Box Plots Showing Baseline Tumor Burden (A) and Number of Previous Lines (B) Distributions According to HPD Status (Immunotherapy Cohort)

**(A)**

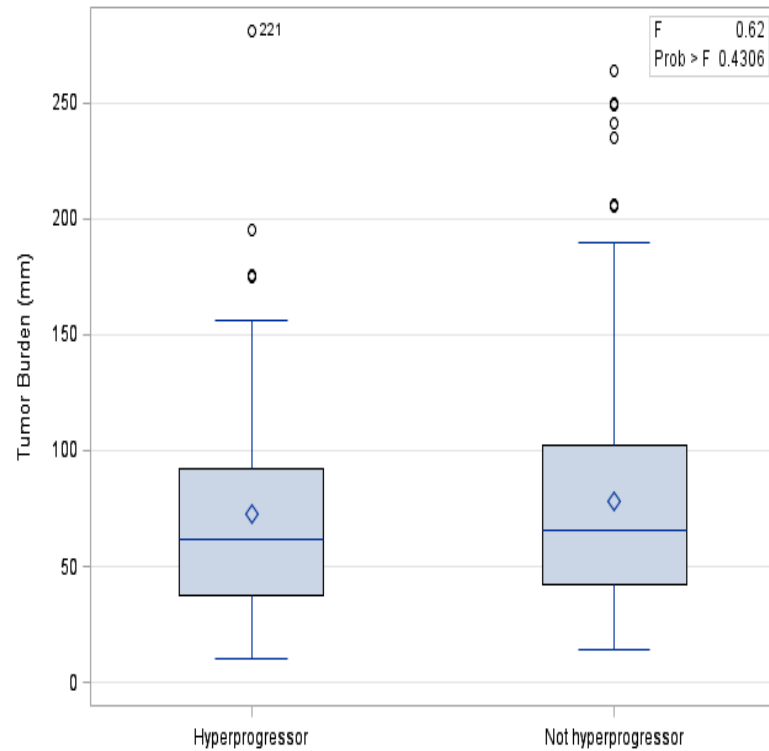

**(B)**

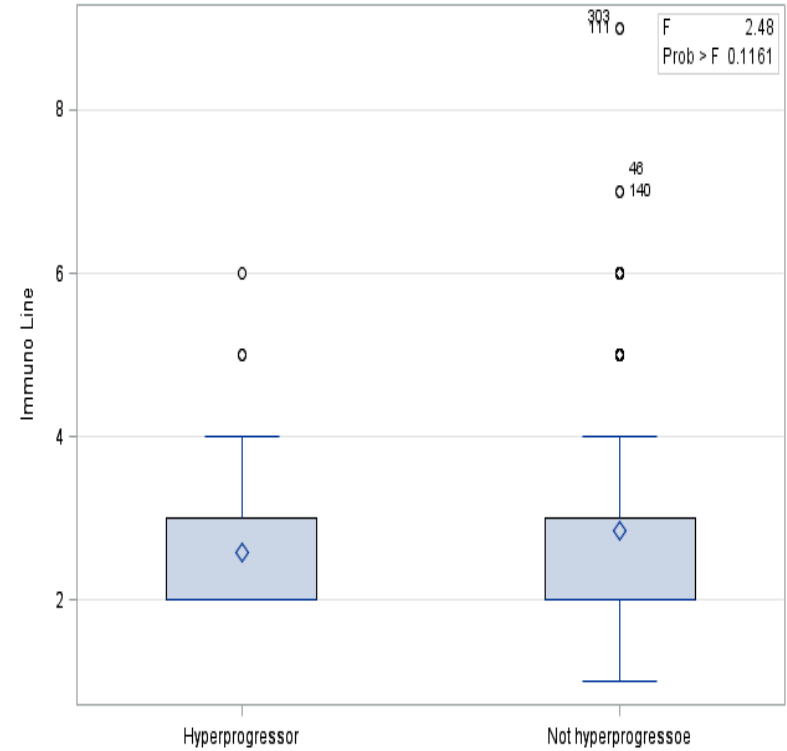

(A) No significant difference in the mean tumor burden at baseline according to HPD status (72 mm HPD vs 78 mm non-HPD,  $p=.43$ ). (B) No significant difference in the mean number of lines before immunotherapy according to HPD status (2.6 HPD vs 2.8 non-HPD,  $p=.11$ ).

**eFigure 3.** Flowchart for *delta* TGR Evaluation in the Chemotherapy Cohort (From a Single Institution)

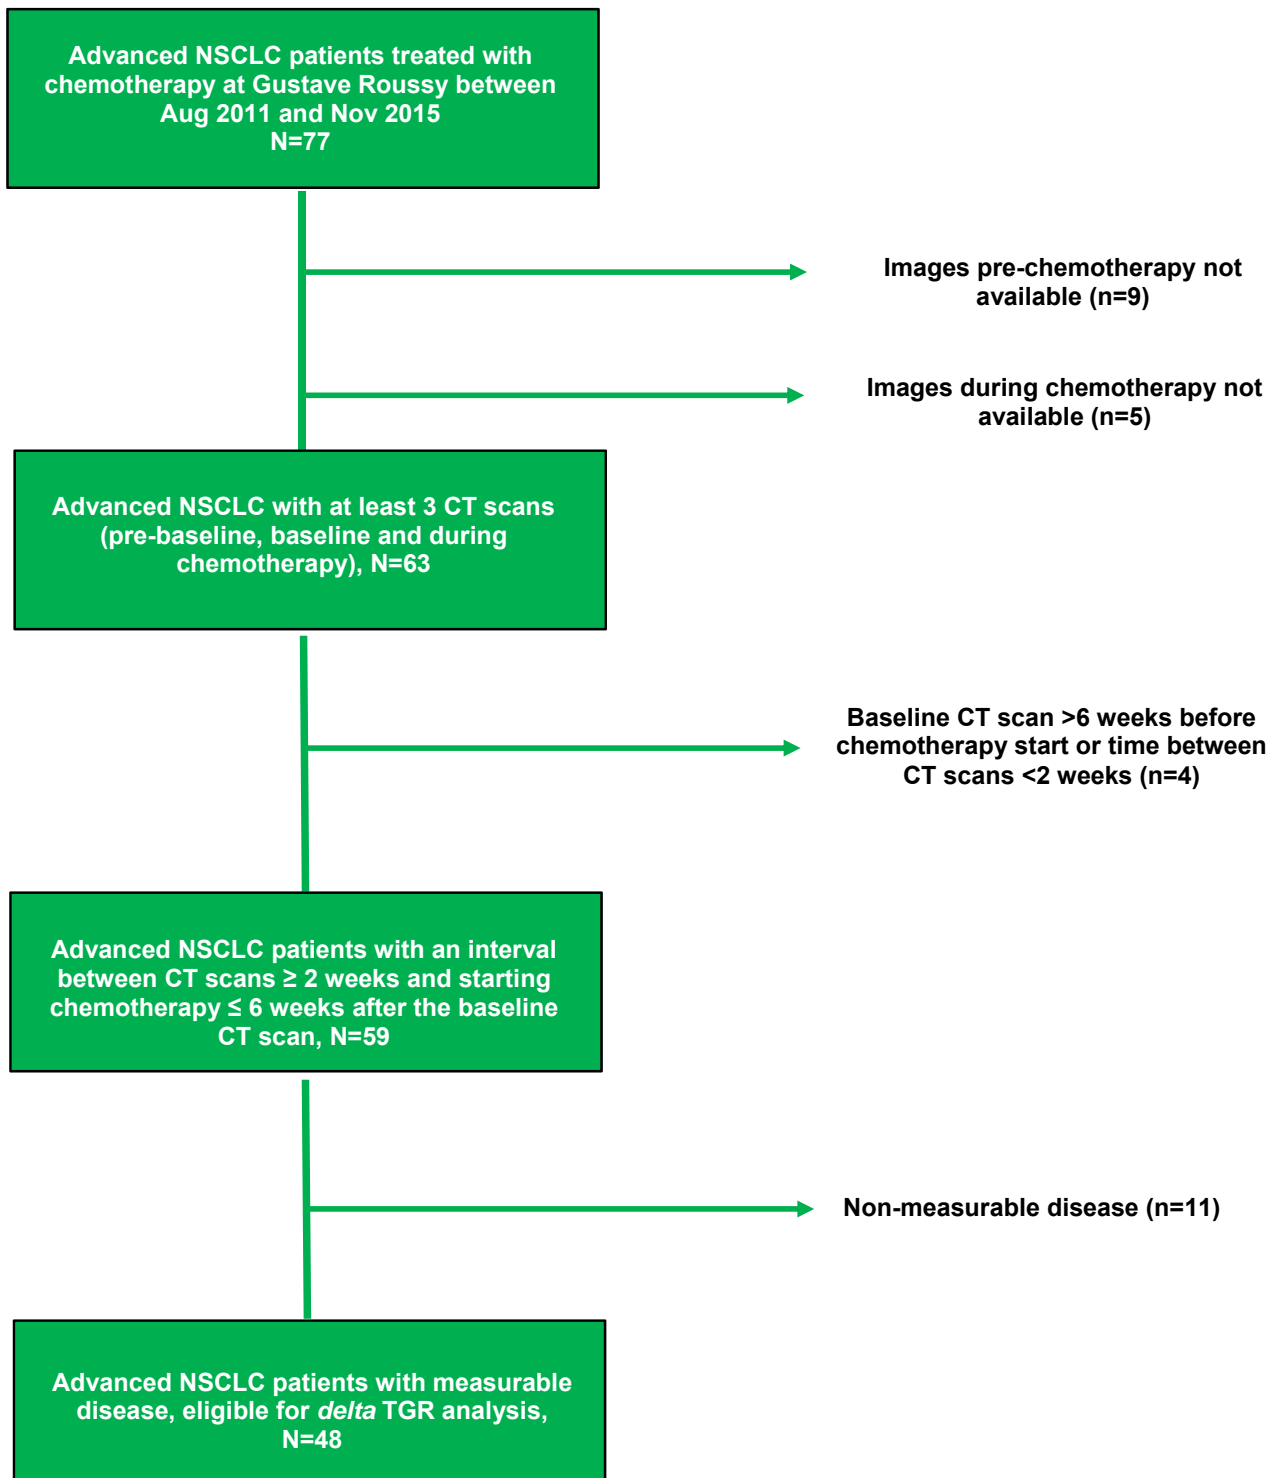

Out of 77 patients treated with single agent chemotherapy at Gustave Roussy, 29 (~38%) were excluded because of unavailability of CT scans before (12%) or during chemotherapy (6%), inadequate time intervals between CT scans (5%) or absence of measurable disease (14%).

**eTable 1.** Typical and Atypical Response Patterns to PD-1/PD-L1 Inhibitors and Single-Agent Chemotherapy

| Best response                  | PD-1/PD-L1 inhibitors (N=406)<br>No. (%) | Single agent chemotherapy (N=59)<br>No. (%) |
|--------------------------------|------------------------------------------|---------------------------------------------|
| CR/PR                          | 77 (19%)                                 | 6 (10%)                                     |
| SD                             | 158 (39%)                                | 35 (59%)                                    |
| PD                             | 170 (42%)                                | 18 (31%)                                    |
| Pseudoprogression <sup>a</sup> | 19 (4.7%)                                | 0 (0%)                                      |

<sup>a</sup> Progressive disease (PD) followed by complete/partial response (CR/PR) or stable disease (SD) lasting more than 6 months

**eTable 2.** TGR Analysis in the Immunotherapy and Single-Agent Chemotherapy Cohorts

|                              | PD-1/PD-L1 inhibitors (N=406)<br>No. (%) | Single-agent chemotherapy (N=59)<br>No. (%) |
|------------------------------|------------------------------------------|---------------------------------------------|
| <b>TGR pre-treatment</b>     |                                          |                                             |
| ≤ 0                          | 75 (18%)                                 | 14 (24%)                                    |
| > 0                          | 331 (82%)                                | 45 (76%)                                    |
| <b>TGR on-treatment</b>      |                                          |                                             |
| ≤ 0                          | 167 (41%)                                | 39 (66%)                                    |
| > 0                          | 239 (59%)                                | 20 (34%)                                    |
| <b>delta TGR<sup>a</sup></b> |                                          |                                             |
| ≤ 0%                         | 266 (66%)                                | 47 (80%)                                    |
| >0% and ≤50%                 | 78 (19%)                                 | 9 (15%)                                     |
| > 50%                        | 62 (15%)                                 | 3 (5%)                                      |

<sup>a</sup> TGR on treatment minus TGR pre-treatment



**eTable 3.** Patient Characteristics in the Chemotherapy Cohort

|                                         | N=59<br>No. (%) |
|-----------------------------------------|-----------------|
| <b>Age</b>                              |                 |
| ≥ 65 years                              | 28 (47%)        |
| <b>Smoking status</b>                   |                 |
| Never smoker                            | 6 (10%)         |
| Former/current                          | 53 (90%)        |
| <b>Histology</b>                        |                 |
| Non-squamous                            | 47 (80%)        |
| <b>Stage<sup>a</sup></b>                |                 |
| III                                     | 7 (12%)         |
| IV                                      | 52 (88%)        |
| <b>No. metastatic sites at baseline</b> |                 |
| > 2                                     | 16 (27%)        |
| <b>Mutational status</b>                |                 |
| <i>EGFR</i> mutation                    | 4 (7%)          |
| <i>ALK</i> rearrangement                | 3 (5%)          |
| <i>KRAS</i> mutation                    | 17 (29%)        |
| Wild-type <sup>b</sup>                  | 9 (15%)         |
| Other alterations                       | 11 (19%)        |
| Missing                                 | 15 (25%)        |
| <b>Performance status</b>               |                 |
| ≥ 2                                     | 8 (13%)         |
| <b>Chemotherapy line (range 2-8)</b>    |                 |
| > 2                                     | 17 (29%)        |
| <b>Chemotherapy drugs</b>               |                 |
| Taxanes <sup>c</sup>                    | 43 (73%)        |
| Pemetrexed                              | 7 (12%)         |
| Vinorelbine                             | 4 (7%)          |
| Gemcitabine                             | 5 (8%)          |

<sup>a</sup> TNM stage (7<sup>th</sup> Edition) at advanced disease detection, <sup>b</sup> wild-type for *EGFR* mutation, *ALK* rearrangement and *KRAS* mutation, <sup>c</sup> single agent docetaxel or paclitaxel

## **eReference**

1. Ferté C, Fernandez M, Hollebecque A, et al. Tumor growth rate is an early indicator of antitumor drug activity in phase I clinical trials. *Clin Cancer Res*. 2014;20(1):246-252.
